# Supplementary material for: Multidisciplinary collaboration among young specialists: results of an international survey by the emerging EULAR network and other young organisations
Source: PubMed Central journal article supplement — RMD Open. 2020 Sep 15;6(2):e001398. doi: 10.1136/rmdopen-2020-001398 (PMC7525255; doi:10.1136/rmdopen-2020-001398), 2020-09-15
Supplement: rmdopen-2020-001398s001.pdf [file rmdopen-2020-001398s001.pdf]

## **Supplementary File 1. Online survey.**

### *A. CONSENT*

1. I agree to participate to this survey about multidisciplinary collaboration among young specialist.

Yes

No

### *B. DEMOGRAPHICS*

2. What is your country of origin?

Albania

Armenia

Austria

Belarus

Belgium

Bosnia and Herzegovina

Bulgaria

Croatia

Cyprus

Czech Republic

Denmark

Estonia

Finland

France

Georgia

Germany

Greece

Hungary

Iceland

Ireland

Israel

Italy

Latvia

Lebanon

Lithuania

Macedonia

Malta

Moldova

Montenegro

Netherlands

Norway

Poland

Portugal

Romania

Russia

San Marino

Serbia

Slovakia

Slovenia

Spain

Sweden

Switzerland

Turkey

Ukraine

United Kingdom

Other (please specify)

### 3. What is your country of work?

Albania  
Armenia  
Austria  
Belarus  
Belgium  
Bosnia and Herzegovina  
Bulgaria  
Croatia  
Cyprus  
Czech Republic  
Denmark  
Estonia  
Finland  
France  
Georgia  
Germany  
Greece  
Hungary  
Iceland  
Ireland  
Israel  
Italy  
Latvia  
Lebanon  
Lithuania  
Macedonia  
Malta  
Moldova  
Montenegro  
Netherlands  
Norway  
Poland  
Portugal  
Romania  
Russia  
San Marino  
Serbia  
Slovakia  
Slovenia  
Spain  
Sweden  
Switzerland  
Turkey  
Ukraine  
United Kingdom  
Other (please specify)

### 4. What is your age?

< 25  
26-30  
31-35  
36-40  
> 40

### 5. What is your gender?

Female  
Male

**6. What is your specialty?**

Allergology  
Clinical Immunology  
Dermatology  
Gastro-enterology  
Internal Medicine  
Nephrology  
Oncology  
Ophthalmology  
Orthopaedic  
Otorhinolaryngology  
Pediatrics  
Pediatrics  
Rheumatology

**7. Are you member of a national young organization?**

Yes  
No

**8. Are you member of a European young organization?**

Yes  
No

**9. Do you have a professional use of social media?**

Facebook Yes  
No

LinkedIn Yes  
No

Twitter Yes  
No

**10. How long is your specialty training? (years)**

2  
3  
4  
5  
6

**11. Do you have formal training in other specialties during your residency/training?**

Yes  
No

**12. If yes, please specify:**

Allergology  
Cardiology  
Clinical immunology  
Dermatology  
Endocrinology  
Gastroenterology  
Infectious diseases  
Intensive care/emergency  
Internal medicine  
Nephrology  
Neurology  
Oncology/hematology  
Ophthalmology  
Orthopedic surgery

Otorhinolaryngology  
Pediatrics  
Pediatrics  
Radiology  
Respiratory  
Rheumatology  
Other (please specify)

### ***C. CLINICAL COLLABORATION***

#### **13. What is your current clinical position?**

Trainee  
Certified specialist or consultant (post-training)  
No clinical work

#### **14. Please indicate the top 3 specialties for collaboration in your daily practice to manage common patients:**

Allergology  
Cardiology  
Clinical immunology  
Dermatology  
Endocrinology  
Gastroenterology  
Gynecology  
Infectious diseases  
Intensive care/emergency  
Internal medicine  
Nephrology  
Neurology  
Oncology/hematology  
Ophthalmology  
Orthopedic surgery  
Otorhinolaryngology  
Pediatrics  
Physical Medicine and Rehabilitation  
Radiology  
Respiratory  
Rheumatology

#### **15. How do you collaborate with other specialists?**

NO    EVERY DAY    2-3 TIMES/WEEK    ONCE A WEEK    EVERY 2 WEEKS    ONCE A MONTH    LESS THAN MONTHLY  
By phone  
By email/software  
By informal personal meeting  
By combined clinics  
By common local multidisciplinary meeting

#### **16. If you have combined clinics, please specify the other speciality involved and frequency:**

ONCE A WEEK    EVERY 2 WEEKS    ONCE A MONTH    LESS THAN MONTHLY  
Allergology  
Cardiology  
Clinical immunology  
Dermatology  
Endocrinology  
Gastroenterology

Gynecology  
Infectious diseases  
Intensive care/emergency  
Internal medicine  
Nephrology  
Neurology  
Oncology/hematology  
Ophthalmology  
Orthopedic surgery  
Pediatrics  
Physical Medicine and  
Rehabilitation  
Radiology  
Respiratory  
Rheumatology

**17. If you have common local multidisciplinary meetings, please specify the specialties involved:**

Allergology  
Cardiology  
Clinical immunology  
Dermatology  
Endocrinology  
Gastroenterology  
Gynecology  
Infectious diseases  
Intensive care/emergency  
Internal medicine  
Nephrology  
Neurology  
Oncology/hematology  
Ophthalmology  
Orthopedic surgery  
Otorhinolaryngology

**18. Is interaction with other young specialists easier than with senior specialists ?**

Yes  
No

**19. Are all the specialists you interact with working in the same place?**

Yes, same institution, same building  
Yes, same institution, different building  
No, different hospital, within same region  
No, different hospital, outside the region

**20. How do you usually start clinical collaboration?**

By knowing other specialists  
By working in the same inpatient department  
By working in the same lab  
By attending common meetings (local, national, international)  
By attending same multidisciplinary meetings  
Arranged by department heads  
Already in place before joining the department

**21. Does your discipline have shared recommendations with other specialties?**

Yes, local shared recommendations  
Yes, national shared recommendations  
Yes, european/international shared recommendations  
No

***D. RESEARCH COLLABORATION***

**22. What is your current research position?**

MD degree (research)  
PhD candidate  
PhD degree  
No research work

**23. Do you have research collaborations with other specialties?**

Yes  
No

**24. If you have or are about to start a research collaboration with other specialties, how did you bring this about?**

By knowing other specialists  
By working in the same inpatient department  
By working in the same lab  
By attending common meetings (local, national, international)  
By attending same multidisciplinary meetings  
Arranged by department heads  
Already in place before joining the lab/department

**25. Have you ever applied for a combined grant across other specialties?**

Yes  
No

**26. Do you have a shared publication with other specialists?**

Yes, in a journal from my specialty  
Yes, in a journal from other specialty  
No

**27. Would you like to develop clinical collaboration with other specialists?**

Yes  
Yes, but there are obstacles within my institution  
No, projects are already running  
Not interested

**28. If yes, please specify at most 3 specialties for such collaboration:**

Allergology  
Cardiology  
Clinical immunology  
Dermatology  
Endocrinology  
Gastroenterology  
Gynecology  
Infectious diseases  
Intensive care/emergency  
Internal medicine  
Nephrology  
Neurology  
Oncology/hematology  
Ophthalmology  
Orthopedic surgery  
Otorhinolaryngology  
Pediatrics  
Physical Medicine and Rehabilitation  
Radiology  
Respiratory  
Rheumatology

**29. Do you think that the establishment of common outpatient clinics with colleagues from other specialties is important?**

Yes, in order to manage a common patient in daily practice

Yes, in order to discuss complex patients

No, no need of common outpatient clinics

**30. Do you think that the development of shared recommendations with colleagues from other specialties is important?**

Yes, local shared recommendations

Yes, national shared recommendations

Yes, european / international shared recommendations

No

**31. Would you like to develop research collaboration with other specialists?**

Basic research

Translational research

Clinical research

**32. Would you apply for a combined grant across other specialties?**

Yes

No

**33. What do you think is important to develop as a multidisciplinary collaboration?**

Daily practice to manage patient, to ask or answer specific questions regarding a common patient

Regular multidisciplinary meetings to discuss about specific diseases / complex patients

Ad-hoc local meetings with several specialties

National meetings with several specialties

International meetings, with maybe a new abstract topic category

Research

Establishment of national and international shared networks (including shared newsletters) of physicians from different specialties

Possibility of having joint publications

**34. Do you think common courses would be worthwhile?**

On-line course

1-2 days course

**35. If yes, please specify with which specialties?**

Allergology

Cardiology

Clinical immunology

Dermatology

Endocrinology

Gastroenterology

Gynecology

Infectious diseases

Intensive care/emergency

Internal medicine

Nephrology

Neurology

Oncology/hematology

Ophthalmology

Orthopedic surgery

Otorhinolaryngology

Pediatrics

Physical Medicine and Rehabilitation

Radiology

Respiratory

Rheumatology

**36. Please specify the type of content you would like:**

Lectures

Case discussion

Training workshops (learning from peers of other specialties, eg. orthopedic musculoskeletal status, neurological status refreshed, etc.)

**37. Do you think interaction / collaboration between young specialists should be developed through social media?**

Common group on Facebook / LinkedIn

Common journal club on Twitter

Common apps on smartphones

Podcasts

**38. Would you be interested in annual or bi-annual multidisciplinary Webinars on a specific disease (recorded with different specialists and made available online)?**

Yes

No
