# Supplementary material for: Multidisciplinary collaboration among young specialists: results of an international survey by the emerging EULAR network and other young organisations
Source: PubMed Central journal article supplement — RMD Open. 2020 Sep 15;6(2):e001398. doi: 10.1136/rmdopen-2020-001398 (PMC7525255; doi:10.1136/rmdopen-2020-001398), 2020-09-15
Supplement: rmdopen-2020-001398s002.pdf [file rmdopen-2020-001398s002.pdf]

## Supplementary Table 1

Supplementary Table 1. Country of work of respondents.

| Country        | Number of participants (%) |
|----------------|----------------------------|
| Albania        | 2 (0.7%)                   |
| Austria        | 5 (1.7%)                   |
| Belgium        | 8 (2.6%)                   |
| Bulgaria       | 4 (1.3%)                   |
| Croatia        | 3 (1%)                     |
| Cyprus         | 1 (0.3%)                   |
| Czech Republic | 2 (0.7%)                   |
| Denmark        | 2 (0.7%)                   |
| France         | 28 (9.2%)                  |
| Germany        | 8 (2.6%)                   |
| Greece         | 9 (3%)                     |
| Hungary        | 1 (0.3%)                   |
| Iceland        | 0                          |
| Ireland        | 3 (1%)                     |
| Israël         | 2 (0.7%)                   |
| Italy          | 54 (17.8%)                 |
| Latvia         | 1 (0.3%)                   |
| Lithuania      | 2 (0.7%)                   |
| Macedonia      | 1 (0.3%)                   |
| Moldova        | 2 (0.7%)                   |
| Montenegro     | 1 (0.3%)                   |
| Netherlands    | 9 (3%)                     |
| Poland         | 2 (0.7%)                   |
| Portugal       | 8 (2.6%)                   |
| Romania        | 9 (3%)                     |
| Russia         | 7 (2.3%)                   |
| San Marino     | 0                          |
| Serbia         | 3 (1%)                     |
| Slovakia       | 2 (0.7%)                   |
| Slovenia       | 2 (0.7%)                   |
| Spain          | 31 (10.2%)                 |
| Sweden         | 1 (0.3%)                   |
| Switzerland    | 3 (1%)                     |

|                |            |
|----------------|------------|
| Turkey         | 8 (2.6%)   |
| Ukraine        | 4 (1.3%)   |
| United Kingdom | 75 (24.8%) |
